# Supplementary material for: Computational Approaches for the Discovery of Human Proteasome Inhibitors: An Overview
Source: PubMed Central journal article supplement (PMC6274525; doi:10.3390/molecules21070927), 2016-07-16
Supplement: molecules-21-00927-s001.pdf [file molecules-21-00927-s001.pdf]

## Supplementary Materials: Computational Approaches for the Discovery of Human Proteasome Inhibitors: An Overview

Romina A. Guedes <sup>1</sup>, Patrícia Serra <sup>1</sup>, Jorge A. R. Salvador <sup>2,3</sup> and Rita C. Guedes <sup>1,\*</sup>

**Table S1.** Computational studies on the field of proteasome inhibitors.

| Reference                                              | Software                                                                                   | PDB ID                                               | Active site | Database/compound(s) studied                                    |
|--------------------------------------------------------|--------------------------------------------------------------------------------------------|------------------------------------------------------|-------------|-----------------------------------------------------------------|
| Kazi <i>et al.</i> [1]                                 | Autodock                                                                                   | 1JD2                                                 | $\beta$ 5   | Genistein                                                       |
| Smith <i>et al.</i> [2]                                | Autodock                                                                                   | 1JD2                                                 | $\beta$ 5   | (-)-EGCG                                                        |
| Rydzewski <i>et al.</i> [3]                            | MOE                                                                                        | 1IRU                                                 | $\beta$ 5   | Vinyl sulfones                                                  |
| Yang <i>et al.</i> [4]                                 | Autodock                                                                                   | 1JD2                                                 | $\beta$ 5   | Pristimerin                                                     |
| Milacic <i>et al.</i> [5]                              | Autodock                                                                                   | 1JD2                                                 | $\beta$ 5   | Curcumin                                                        |
| Leban <i>et al.</i> [6]                                | ProPose                                                                                    | 1IRU                                                 | $\beta$ 5   | Peptide-semicarbazones                                          |
| Zhang <i>et al.</i> [7]                                | GOLD                                                                                       | Crystal structures of<br>MG101-proteasome<br>complex |             | MG132                                                           |
|                                                        | MD: Amber<br>(Divcon and Antechamber modules –<br>determination of partial atomic charges) |                                                      |             |                                                                 |
| Basse <i>et al.</i> [8]                                | FRED, LigandFit, Surflex<br>MolDock                                                        | 1IRU                                                 | $\beta$ 5   | Chembridge compound collection<br>(~300000 molecules)           |
| Zhu <i>et al.</i> [9]                                  | GOLD                                                                                       | 2F16                                                 | $\beta$ 5   | Dipeptidyl boronic acids                                        |
| Kanwar <i>et al.</i> [10]<br>(Smith <i>et al.</i> [2]) | AutoDock                                                                                   | 1JD2                                                 | $\beta$ 5   | Catechol- <i>O</i> -methyltransferase-resistant<br>EGCG analogs |
| Shi <i>et al.</i> [11]                                 | AutoDock                                                                                   | Eukaryotic yeast<br>proteasome                       | $\beta$ 5   | Organotin compounds (butyltins and<br>phenyltins)               |
| Bonfili <i>et al.</i> [12]                             | InsightII                                                                                  | 1IRU                                                 |             | EGCG oxidation derivative                                       |
| Ma <i>et al.</i> [13]                                  | GOLD                                                                                       | Yeast<br>proteasome:MG101<br>complex                 | $\beta$ 5   | Peptide aldehyde derivatives                                    |

Table S1. Cont.

| Reference                                   | Software                             | PDB ID                      | Active site                        | Database/compound(s) studied                                  |
|---------------------------------------------|--------------------------------------|-----------------------------|------------------------------------|---------------------------------------------------------------|
| Xu <i>et al.</i> [14]                       |                                      |                             | $\beta$ 5                          | Naphthoquinone derivatives                                    |
| Pham <i>et al.</i> [15]                     |                                      | 1IRU                        | $\beta$ 1, $\beta$ 2 and $\beta$ 5 | Cerpegin derivatives                                          |
| Santoro <i>et al.</i> [16]                  | AutoDock Vina                        | 2F16                        | $\beta$ 5                          | Cationic and anionic porphyrins                               |
| Hovhannisyan <i>et al.</i> [17]             | AutoDock                             | 1IRU                        | $\beta$ 5                          | Cerpegin derivatives                                          |
| Maréchal <i>et al.</i> [18]                 | MS-Dock, LigandFit and Surflex.      | Constitutive 20S proteasome | $\beta$ 5                          | ChemBridge compound collection                                |
| (same procedure as Basse <i>et al.</i> [8]) |                                      |                             |                                    |                                                               |
| Jiang <i>et al.</i> [19]                    | AutoDock Vina                        | 2F16                        | $\beta$ 1, $\beta$ 2 and $\beta$ 5 | Marchantin M                                                  |
| Orabi <i>et al.</i> [20]                    | Surflex-Dock interfaced with SYBYL-X | 1R0P and 1JD2               | $\beta$ 1, $\beta$ 2 and $\beta$ 5 | TMC-95A, bortezomib and syringic acid derivatives             |
|                                             |                                      | 2F16 and 1JD2               |                                    |                                                               |
| Zuo <i>et al.</i> [21]                      | GLIDE                                | 2F16                        |                                    | Amino acid Schiff basecopper complexes; bortezomib as control |
| Bordessa <i>et al.</i> [22]                 | GOLD                                 | 1IRU                        | $\beta$ 5                          | Library of pseudopeptides                                     |
| Kawamura <i>et al.</i> [23]                 | Glide                                | 3GPT                        | $\beta$ 5                          | Salinosporamide A derivatives                                 |
| Li <i>et al.</i> [24]                       | Ph4 SB                               | 3UNB                        | $\beta$ 5                          | Epoxyketones                                                  |
|                                             | LigandScout                          |                             |                                    |                                                               |
|                                             | Noncovalent docking: LibDock         | 3UNB                        |                                    |                                                               |
|                                             | Covalent docking: GOLD               | 3UNB                        |                                    |                                                               |
|                                             | MD: Desmond software                 | 3UNB                        |                                    |                                                               |
|                                             | ADME: QikProp                        | --                          |                                    |                                                               |
| Hasegawa <i>et al.</i> [25]                 | MD: Chem3D                           |                             | $\beta$ 1, $\beta$ 2 and $\beta$ 5 | Tamoxifen derivatives (RID-A – RID-H)                         |
|                                             | MOE                                  | 3D29                        |                                    | Ridaifen-F derivatives                                        |
|                                             | ASEDock                              |                             |                                    |                                                               |
| Scarbaci <i>et al.</i> [26]                 | GOLD                                 | 2F16                        | $\beta$ 5                          | Peptidomimetic boronates                                      |

Table S1. Cont.

| Reference            | Software                                                          | PDB ID                                       | Active site                        | Database/compound(s) studied                                                 |
|----------------------|-------------------------------------------------------------------|----------------------------------------------|------------------------------------|------------------------------------------------------------------------------|
| Troiano et. al. [27] | GOLD                                                              | 2F16                                         | $\beta$ 5                          | Pseudopeptide boronates                                                      |
| Voss et al. [28]     | MOE                                                               | 4R02                                         | $\beta$ 5                          | $\alpha$ -Keto phenylamides                                                  |
| Miller et al. [29]   | FRED                                                              |                                              | $\beta$ 5                          | 345 447 compounds included in the University of Cincinnati library           |
|                      |                                                                   |                                              | $\beta$ 5                          | Non-peptide, reversible proteasome inhibitor with a pyrazole scaffold        |
| Scotti et al. [30]   | MM-PBSA and MM-GBSA<br>MD: semi-empirical PM3 calculations<br>MOE | 1G65 (for $\beta$ 1)<br>4LQI (for $\beta$ 5) | $\beta$ 1                          | Naphthoquinone dipeptide derivatives<br>Naphthoquinone dipeptide derivatives |
| Xu et al. [31]       | Discovery Studio, Ligandfit protocol,                             | 3SDK                                         | $\beta$ 5                          | Linear peptide                                                               |
| Pundir et al. [32]   | MOE                                                               | 2F16 and 1IRU                                | $\beta$ 1, $\beta$ 2 and $\beta$ 5 | 4-piperazynilquinoline scaffold and a sulfonyl pharmacophore                 |
| Sun et al. [33]      | AutoDock                                                          | 4NO8                                         | $\beta$ 5                          | Furan-based peptides (dipeptidic and tripeptidic inhibitors)                 |
|                      | MD: Sander module (AMBER 11)<br>Ab initio: Gaussian               | 4NO8                                         | $\beta$ 5                          | Tripeptide derivative (furan-based)                                          |

## Reference:

1. Kazi, A.; Daniel, K.G.; Smith, D.M.; Kumar, N.B.; Dou, Q.P. Inhibition of the proteasome activity, a novel mechanism associated with the tumor cell apoptosis-inducing ability of genistein. *Biochem. Pharmacol.* **2003**, *66*, 965–976.
2. Smith, D.M.; Daniel, K.G.; Wang, Z.; Guida, W.C.; Chan, T.-H.; Dou, Q.P. Docking studies and model development of tea polyphenol proteasome inhibitors: applications to rational drug design. *Proteins* **2004**, *54*, 58–70.
3. Rydzewski, R.M.; Burrill, L.; Mendonca, R.; Palmer, J.T.; Rice, M.; Tahilramani, R.; Bass, K.E.; Leung, L.; Gjerstad, E.; Janc, J.W.; Pan, L. Optimization of subsite binding to the beta5 subunit of the human 20S proteasome using vinyl sulfones and 2-keto-1,3,4-oxadiazoles: Syntheses and cellular properties of potent, selective proteasome inhibitors. *J. Med. Chem.* **2006**, *49*, 2953–2968.
4. Yang, H.; Landis-Piwowar, K.R.; Lu, D.; Yuan, P.; Li, L.; Prem-Veer Reddy, G.; Yuan, X.; Dou, Q.P. Pristimerin induces apoptosis by targeting the proteasome in prostate cancer cells. *J. Cell. Biochem.* **2008**, *103*, 234–244.
5. Milacic, V.; Banerjee, S.; Landis-Piwowar, K.R.; Sarkar, F.H.; Majumdar, A.P.N.; Dou, Q.P. Curcumin inhibits the proteasome activity in human colon cancer cells *in vitro* and *in vivo*. *Cancer Res.* **2008**, *68*, 7283–7292.
6. Leban, J.; Blisse, M.; Krauss, B.; Rath, S.; Baumgartner, R.; Seifert, M.H.J. Proteasome inhibition by peptide-semicarbazones. *Bioorganic Med. Chem.* **2008**, *16*, 4579–4588.
7. Zhang, S.; Shi, Y.; Jin, H.; Liu, Z.; Zhang, L.; Zhang, L. Covalent complexes of proteasome model with peptide aldehyde inhibitors MG132 and MG101: Docking and molecular dynamics study. *J. Mol. Model.* **2009**, *15*, 1481–1490.
8. Basse, N.; Montes, M.; Maréchal, X.; Qin, L.; Bouvier-Durand, M.; Genin, E.; Vidal, J.; Villoutreix, B.O.; Reboud-Ravaux, M. Novel organic proteasome inhibitors identified by virtual and *in vitro* screening. *J. Med. Chem.* **2010**, *53*, 509–513.
9. Zhu, Y.; Zhu, X.; Wu, G.; Ma, Y.; Li, Y.; Zhao, X.; Yuan, Y.; Yang, J.; Yu, S.; Shao, F.; et al. Synthesis, *in vitro* and *in vivo* biological evaluation, docking studies, and structure-activity relationship (SAR) discussion of dipeptidyl boronic acid proteasome inhibitors composed of  $\beta$ -amino acids. *J. Med. Chem.* **2010**, *53*, 1990–1999.
10. Kanwar, J.; Imthiyaz Moahammad; Huanjie Yang; Huo, C.; Chan, T.H.; Dou, Q.P. Computational modeling of the potential interactions of the proteasome  $\beta$ 5 subunit and catechol-*O*-methyltransferase-resistant EGCG analogs. *Int. J. Mol. Med.* **2010**, *26*, 837–843.
11. Shi, G.; Sun, Q.; Yang, H.; Dou, Q.; Deng, Q.; Wang, H.; Zhong, G. Molecular modeling for the interaction between proteasome beta 5 subunit and organotin compounds. *Sci. China Chem.* **2010**, *53*, 2387–2393.
12. Bonfili, L.; Cuccioloni, M.; Mozzicafreddo, M.; Cecarini, V.; Angeletti, M.; Eleuteri, A.M. Identification of an EGCG oxidation derivative with proteasome modulatory activity. *Biochimie* **2011**, *93*, 931–940.
13. Ma, Y.; Xu, B.; Fang, Y.; Yang, Z.; Cui, J.; Zhang, L.; Zhang, L. Synthesis and SAR study of novel peptide aldehydes as inhibitors of 20S proteasome. *Molecules* **2011**, *16*, 7551–7564.
14. Xu, K.; Xiao, Z.; Tang, Y.B.; Huang, L.; Chen, C.-H.; Ohkoshi, E.; Lee, K.-H. Design and synthesis of naphthoquinone derivatives as antiproliferative agents and 20S proteasome inhibitors. *Bioorg. Med. Chem. Lett.* **2012**, *22*, 2772–2774.
15. Pham, T.H.; Hovhannisyann, A.; Bouvier, D.; Tian, L.; Reboud-Ravaux, M.; Melikyan, G.; Bouvier-Durand, M. A new series of N5 derivatives of the 1,1,5-trimethyl furo[3,4-c]pyridine-3,4-dione (cerpegin) selectively inhibits the post-acid activity of mammalian 20S proteasomes. *Bioorg. Med. Chem. Lett.* **2012**, *22*, 3822–3827.
16. Santoro, A.M.; Lo Giudice, M.C.; D'Urso, A.; Lauceri, R.; Purrello, R.; Milardi, D. Cationic porphyrins are reversible proteasome inhibitors. *J. Am. Chem. Soc.* **2012**, *134*, 10451–10457.
17. Hovhannisyann, A.; Pham, T.H.; Bouvier, D.; Qin, L.; Melikyan, G.; Reboud-Ravaux, M.; Bouvier-Durand, M. C1 and N5 derivatives of cerpegin: Synthesis of a new series based on structure-activity relationships to optimize their inhibitory effect on 20S proteasome. *Bioorganic Med. Chem. Lett.* **2013**, *23*, 2696–2703.

18. Maréchal, X.; Genin, E.; Qin, L.; Sperandio, O.; Montes, M.; Basse, N.; Richy, N.; Miteva, M.A.; Vidal, J.; Villoutreix, B.O. 1,2,4-Oxadiazoles identified by virtual screening and their non-covalent inhibition of the human 20S Proteasome. *2013*, doi:10.2174/0929867311320180006.
19. Jiang, H.; Sun, J.; Xu, Q.; Liu, Y.; Wei, J.; Young, C.Y.F.; Yuan, H.; Lou, H. Marchantin M: a novel inhibitor of proteasome induces autophagic cell death in prostate cancer cells. *Cell Death Dis.* **2013**, doi:10.1038/cddis.2013.285.
20. Orabi, K.Y.; Abaza, M.S.; El Sayed, K.A.; Elnagar, A.Y.; Al-Attayah, R.; Guleri, R.P. Selective growth inhibition of human malignant melanoma cells by syringic acid-derived proteasome inhibitors. *Cancer Cell Int.* **2013**, doi:10.1186/1475-2867-13-82.
21. Zuo, J.; Caifeng, B.; Yuhua, F.; Daniela, B.; Chiara, N.; Kenyon, G.D.; Ping, D.Q. Cellular and computational studies of proteasome inhibition and apoptosis induction in human cancer cells by amino acid Schiff base-copper complexes. *J. Inorg. Biochem.* **2013**, *118*, 83–93.
22. Bordessa, A.; Keita, M.; Maréchal, X.; Formicola, L.; Lagarde, N.; Rodrigo, J.; Bernadat, G.; Bauvais, C.; Soulier, J.-L.; Dufau, L.; et al.  $\alpha$ - and  $\beta$ -hydrazino acid-based pseudopeptides inhibit the chymotrypsin-like activity of the eukaryotic 20S proteasome. *Eur. J. Med. Chem.* **2013**, *70*, 505–524.
23. Kawamura, S.; Unno, Y.; Tanaka, M.; Sasaki, T.; Yamano, A.; Hirokawa, T.; Kameda, T.; Asai, A.; Arisawa, M.; Shuto, S. Investigation of the noncovalent binding mode of covalent proteasome inhibitors around the transition state by combined use of cyclopropyl strain-based conformational restriction and computational modeling. *J. Med. Chem.* **2013**, doi:10.1021/jm400542h.
24. Li, A.; Sun, H.; Du, L.; Wu, X.; Cao, J.; You, Q.; Li, Y. Discovery of novel covalent proteasome inhibitors through a combination of pharmacophore screening, covalent docking, and molecular dynamics simulations. *J. Mol. Model.* **2014**, doi:10.1007/s00894-014-2515-y.
25. Hasegawa, M.; Yasuda, Y.; Tanaka, M.; Nakata, K.; Umeda, E.; Wang, Y.; Watanabe, C.; Uetake, S.; Kunoh, T.; Shionyu, M.; et al. A novel tamoxifen derivative, ridaifen-F, is a nonpeptidic small-molecule proteasome inhibitor. *Eur. J. Med. Chem.* **2014**, *71*, 290–305.
26. Scarbaci, K.; Troiano, V.; Ettari, R.; Pinto, A.; Micale, N.; di Giovanni, C.; Cerchia, C.; Schirmeister, T.; Novellino, E.; Lavecchia, A.; et al. Development of novel selective peptidomimetics containing a boronic acid moiety, targeting the 20s proteasome as anticancer agents. *ChemMedChem* **2014**, *9*, 1801–1816.
27. Troiano, V.; Scarbaci, K.; Ettari, R.; Micale, N.; Cerchia, C.; Pinto, A.; Schirmeister, T.; Novellino, E.; Grasso, S.; Lavecchia, A.; Zappalà, M. Optimization of peptidomimetic boronates bearing a P3 bicyclic scaffold as proteasome inhibitors. *Eur. J. Med. Chem.* **2014**, doi:10.1016/j.ejmech.2014.06.017.
28. Voss, C.; Scholz, C.; Knorr, S.; Beck, P.; Stein, M.L.; Zall, A.; Kuckelkorn, U.; Kloetzel, P.M.; Groll, M.; Hamacher, K.; Schmidt, B.  $\alpha$ -Keto phenylamides as P1'-extended proteasome inhibitors. *ChemMedChem* **2014**, 2557–2564.
29. Miller, Z.; Kim, K.-S.; Lee, D.-M.; Kasam, V.; Baek, S.E.; Lee, K.H.; Zhang, Y.-Y.; Ao, L.; Carmony, K.; Lee, N.-R.; et al. Proteasome inhibitors with pyrazole scaffolds from structure-based virtual screening. *J. Med. Chem.* **2015**, doi:10.1021/jm501344n.
30. Scotti, A.; Trapella, C.; Ferretti, V.; Gallerani, E.; Gavioli, R.; Marastoni, M. Studies of C-terminal naphthoquinone dipeptides as 20S proteasome inhibitors. *J. Enzyme Inhib. Med. Chem.* **2015**, doi:10.3109/14756366.2015.1037749.
31. Xu, K.; Wang, K.; Yang, Y.; Yan, D.-A.; Huang, L.; Chen, C.-H.; Xiao, Z. Discovery of novel non-covalent inhibitors selective to the  $\beta$ 5-subunit of the human 20S proteasome. *Eur. J. Med. Chem.* **2015**, *98*, 61–68.
32. Pundir, S.; Vu, H.-Y.; Solomon, V.R.; McClure, R.; Lee, H. VR23: A quinoline-sulfonyl hybrid proteasome inhibitor that selectively kills cancer via cyclin E-mediated centrosome amplification. *Cancer Res.* **2015**, *75*, 7164–7175.
33. Sun, Q.; Xu, B.; Niu, Y.; Xu, F.; Liang, L.; Wang, C.; Yu, J.; Yan, G.; Wang, W.; Jin, H.; et al. Synthesis, bioactivity, docking and molecular dynamics studies of furan-based peptides as 20S proteasome inhibitors. *ChemMedChem* **2015**, *10*, 498–510.
